# Supplementary material
Source: HighWire-hosted journal article supplement (https://jnm.snmjournals.org/highwire/filestream/94379/field_highwire_adjunct_files/0/98087_Supplemental_Data.pdf)
Supplement: 98087_Supplemental_Data.pdf [file 98087_Supplemental_Data.pdf]

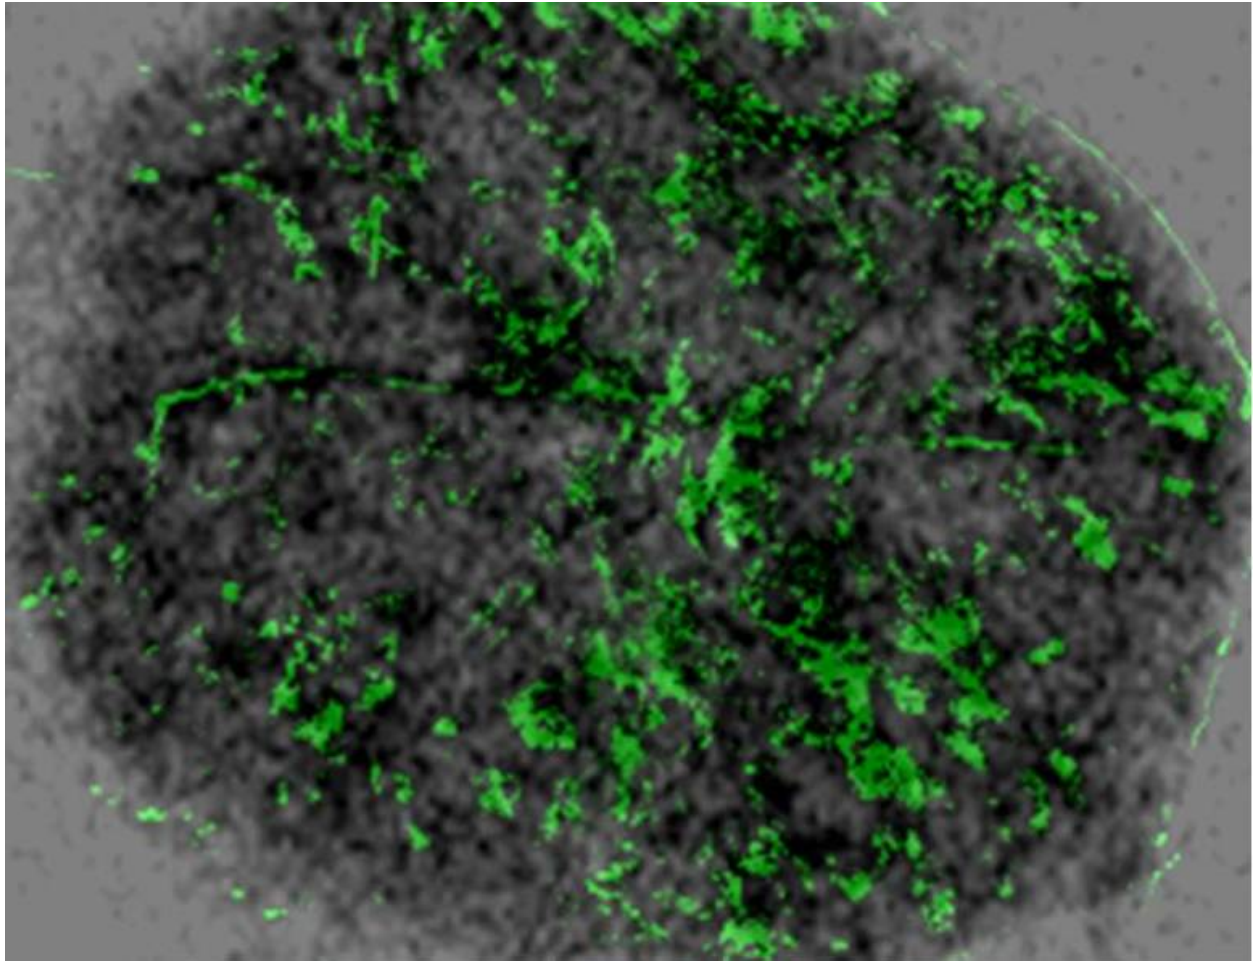

**Supplemental Figure 1**

The overlaid image of  $^{18}\text{F}$ -FDG autoradiography and pimonidazole immunohistochemical staining (green) from an HTB177 subcutaneous xenograft section presented in Figure 2.

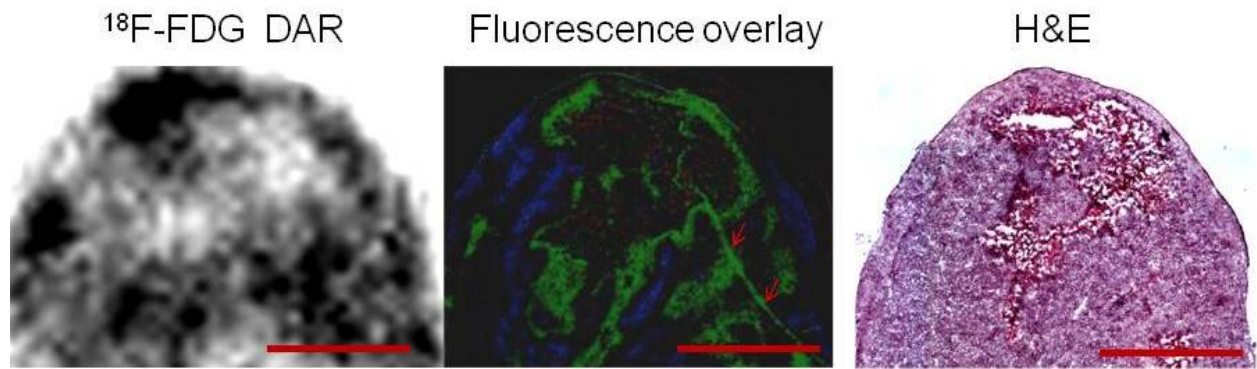

### Supplemental Figure 2

Relationship between  $^{18}\text{F}$ -FDG uptake and hypoxia, proliferation and blood perfusion in a HTB177 peritoneal tumor. High  $^{18}\text{F}$ -FDG uptake detected by digital autoradiography (DAR) is found in hypoxic (pimonidazole positive, green) but lowly proliferating (bromodeoxyuridine negative) cancer cells. Non-hypoxic and proliferative cancer cells (bromodeoxyuridine positive, red) which are well perfused (Hoechst positive, blue), have low  $^{18}\text{F}$ -FDG uptake. Stroma and necrotic zones associate with low  $^{18}\text{F}$ -FDG activity. H&E from an adjacent section provided for reference. The red arrows denote a region of nonspecific binding of anti-pimonidazole antibody. All scale bars = 1 mm.

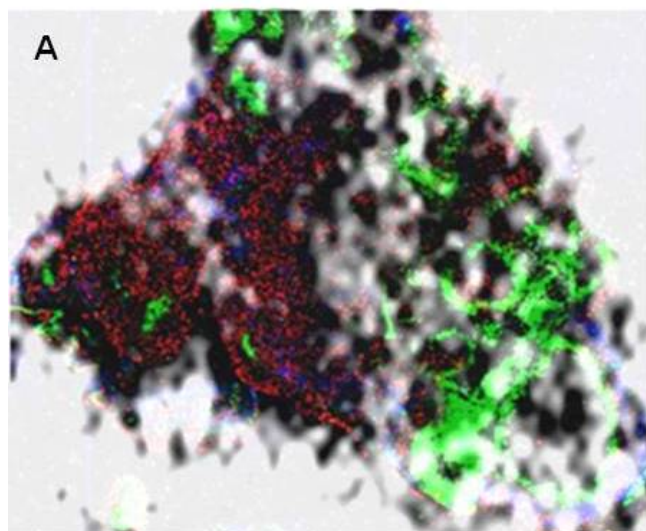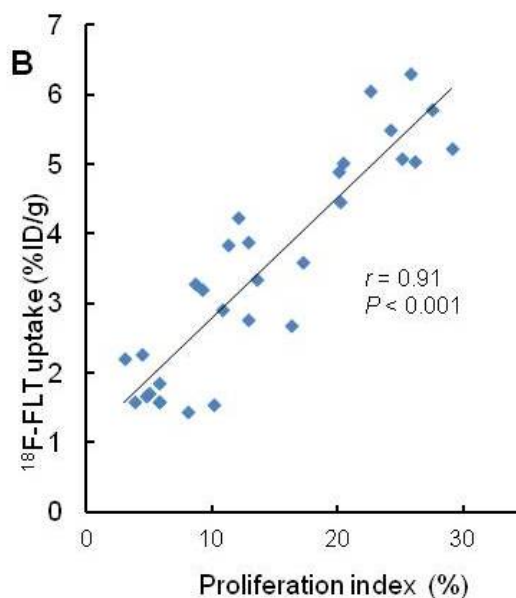

### Supplemental Figure 3

A. The overlaid image of  $^{18}\text{F}$ -FLT autoradiography and merged immunohistochemical staining of bromodeoxyuridine (red), pimonidazole (green) and Hoechst (blue) in a section of HTB177 peritoneal tumors, presented in Figure 3.

B. Correlation between bromodeoxyuridine defined proliferative index and  $^{18}\text{F}$ -FLT,  $r = 0.91$ ,  $P < 0.001$ .

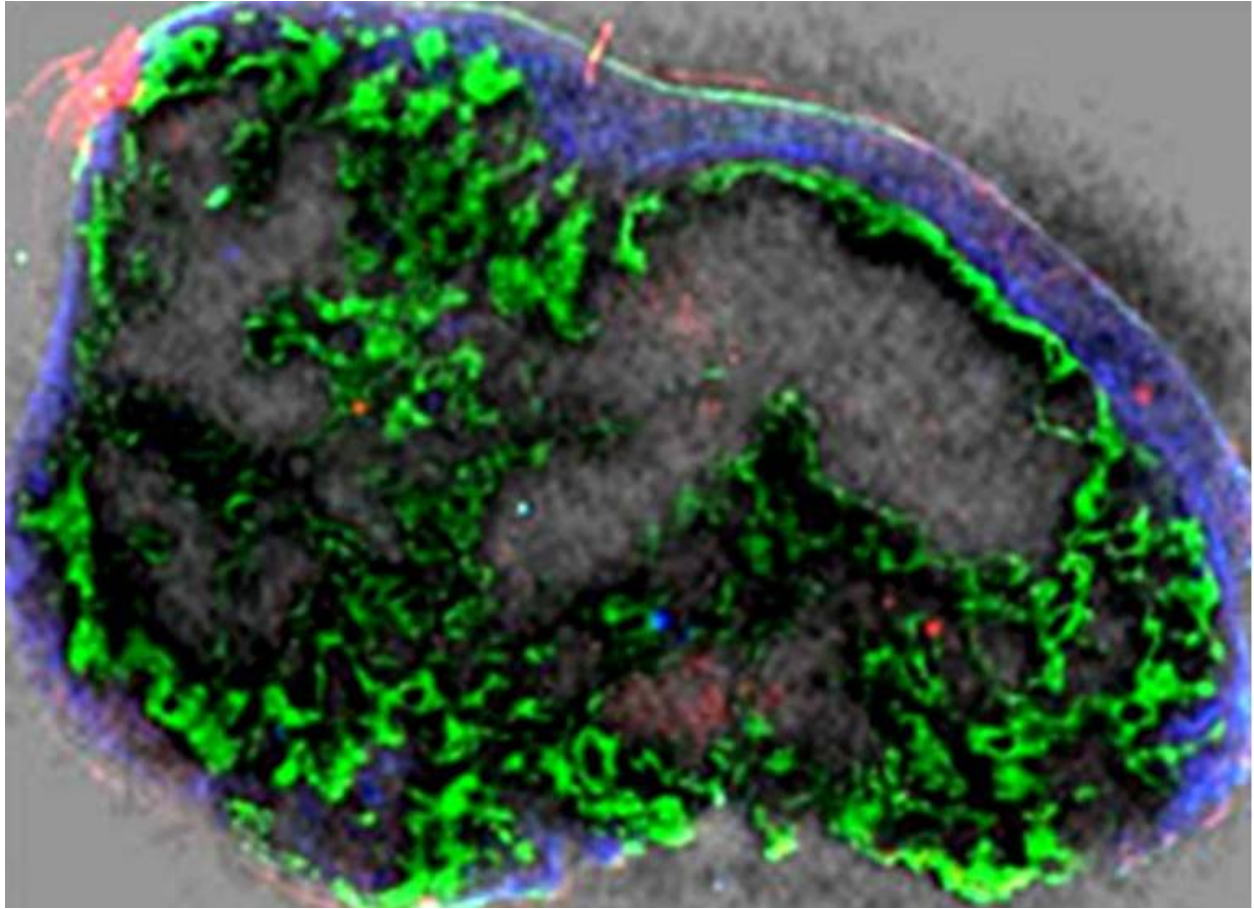

#### Supplemental Figure 4

- A.** The overlaid image of  $^{18}\text{F}$ -FMISO digital autoradiography and merged immunohistochemical staining of bromodeoxyuridine (red), pimonidazole (green) and Hoechst (blue) in the section of an A549 subcutaneous xenograft, which is presented in Figure 4.
- B.** Relationship between  $^{18}\text{F}$ -FMISO uptake and hypoxia, proliferation and blood perfusion in A549 peritoneal tumors. High  $^{18}\text{F}$ -FMISO uptake closely associates with hypoxic [pimonidazole (green) positive] cancer cells (circle). Non-hypoxic cancer cells are proliferative [bromodeoxyuridine (red) positive], well perfused (Hoechst positive, blue) (square), and have low  $^{18}\text{F}$ -FMISO uptake. Stroma and necrotic zones associate with low  $^{18}\text{F}$ -FMISO activity. H&E from adjacent section provided for reference. All scale bars = 1mm.

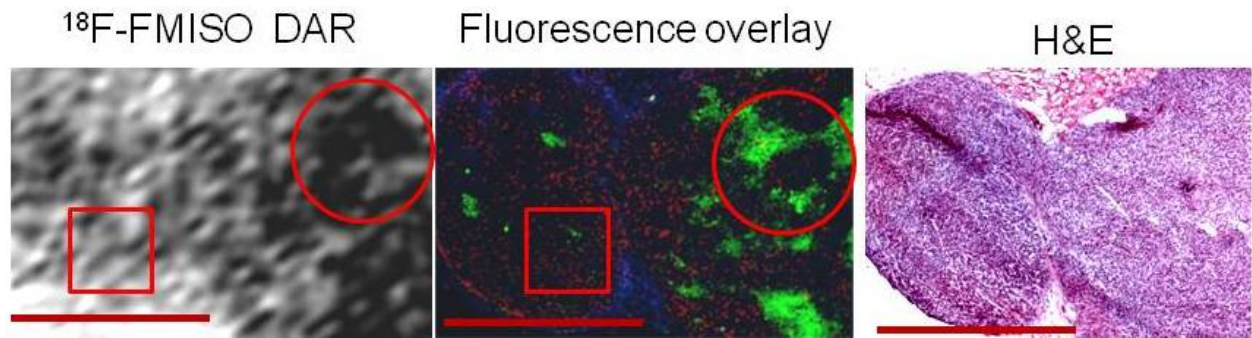

**Supplemental Figure 5**

Relative  $^{18}\text{F}$ -FDG,  $^{18}\text{F}$ -FLT and  $^{18}\text{F}$ -FMISO uptake (%) to the maximal %ID/g of each tracer; relative uptake was compared between hypoxic and non-hypoxic cancer cells. \*\*  $P < 0.001$ .
